# Supplementary material for: Bimetallic gold and palladium nanoparticles supported on copper oxide nanorods for enhanced H2O2 catalytic reduction and sensing
Source: RSC Adv. 2021 Aug 26;11(46):28818–28. doi: 10.1039/d1ra05247k (PMC9038116; doi:10.1039/d1ra05247k)
Supplement: RA-011-D1RA05247K-s001 [file RA-011-D1RA05247K-s001.pdf]

## Electronic Support Information (ESI)

### **Bimetallic gold and palladium nanoparticles supported on copper oxide nanorods for enhanced H<sub>2</sub>O<sub>2</sub> catalytic reduction and sensing**

Simbongile Sicwetsha,<sup>a</sup> Omotayo Adeniyi,<sup>a</sup> Philani Mashazi<sup>a,b,\*</sup>

<sup>a</sup>Department of Chemistry, Rhodes University, P.O. Box 94, Makhanda, 6140, South Africa.

<sup>b</sup>Institute for Nanotechnology Innovation, Rhodes University, P.O. Box 94, Makhanda, 6140, South Africa.

\*Correspondence: p.mashazi@ru.ac.za

Energy dispersive spectroscopy (EDS) was used to investigate the elemental composition of the prepared CuONRs and the gold and palladium supported onto CuONRs. **Figure S1** shows EDS spectra of (a) CuONRs, (b) CuONRs@Au<sub>6</sub>NPs, (c) CuONRs@Pd<sub>6</sub>NPs, and (d) CuONRs@Au<sub>3</sub>Pd<sub>3</sub>NPs. The EDS spectrum of CuONRs showed the presence of Cu, O and C. The presence of C emanates from the carbon tape that was used to mount the sample on the stub. The EDS spectra of CuONRs@Au<sub>6</sub>NPs, CuONRs@Pd<sub>6</sub>NPs and CuONRs@Au<sub>3</sub>Pd<sub>3</sub>NPs showed additional peaks that are due to Au and Pd nanoparticles. X-ray photoelectron spectroscopy was used for quantitative analysis of the samples.

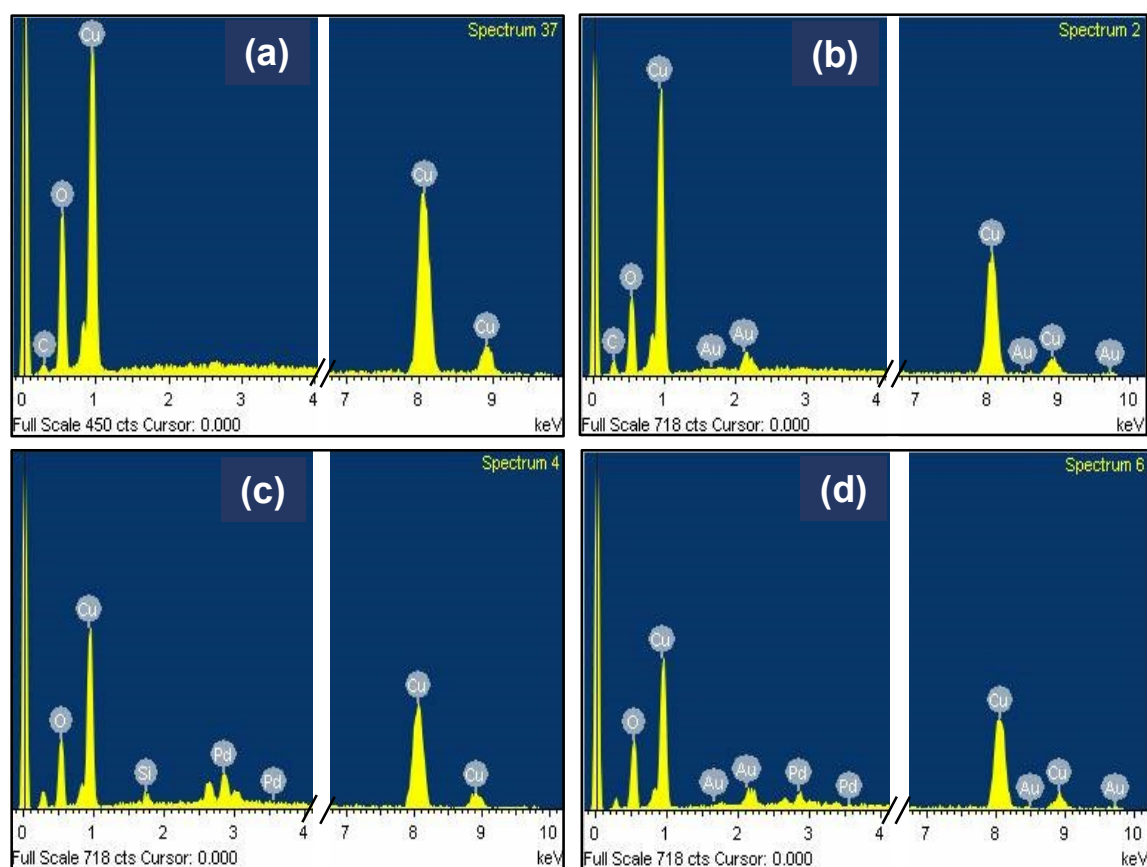

**Figure S1:** EDS spectra of (a) CuONRs, (b) CuONRs@Au<sub>6</sub>NPs, CuONRs@Pd<sub>6</sub>NPs, and (d) CuONRs@Au<sub>3</sub>Pd<sub>3</sub>NPs.

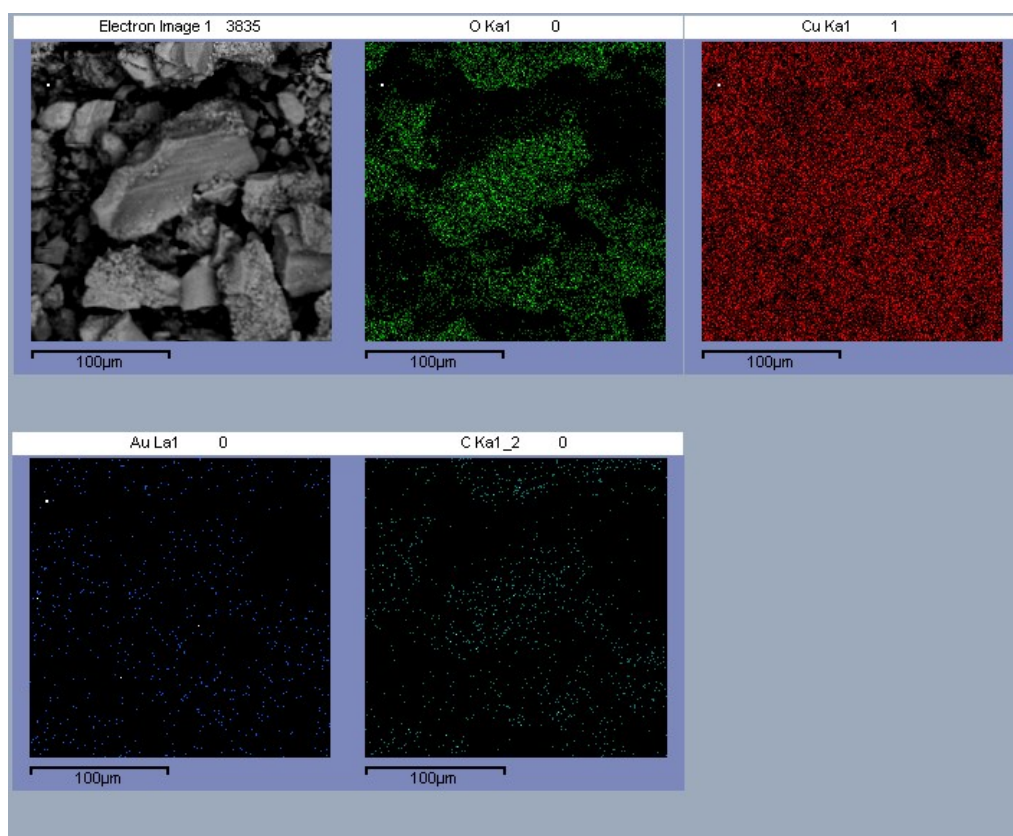

**Figure S2:** SEM-EDS elemental mapping of CuONRs@Au<sub>6</sub>NPs

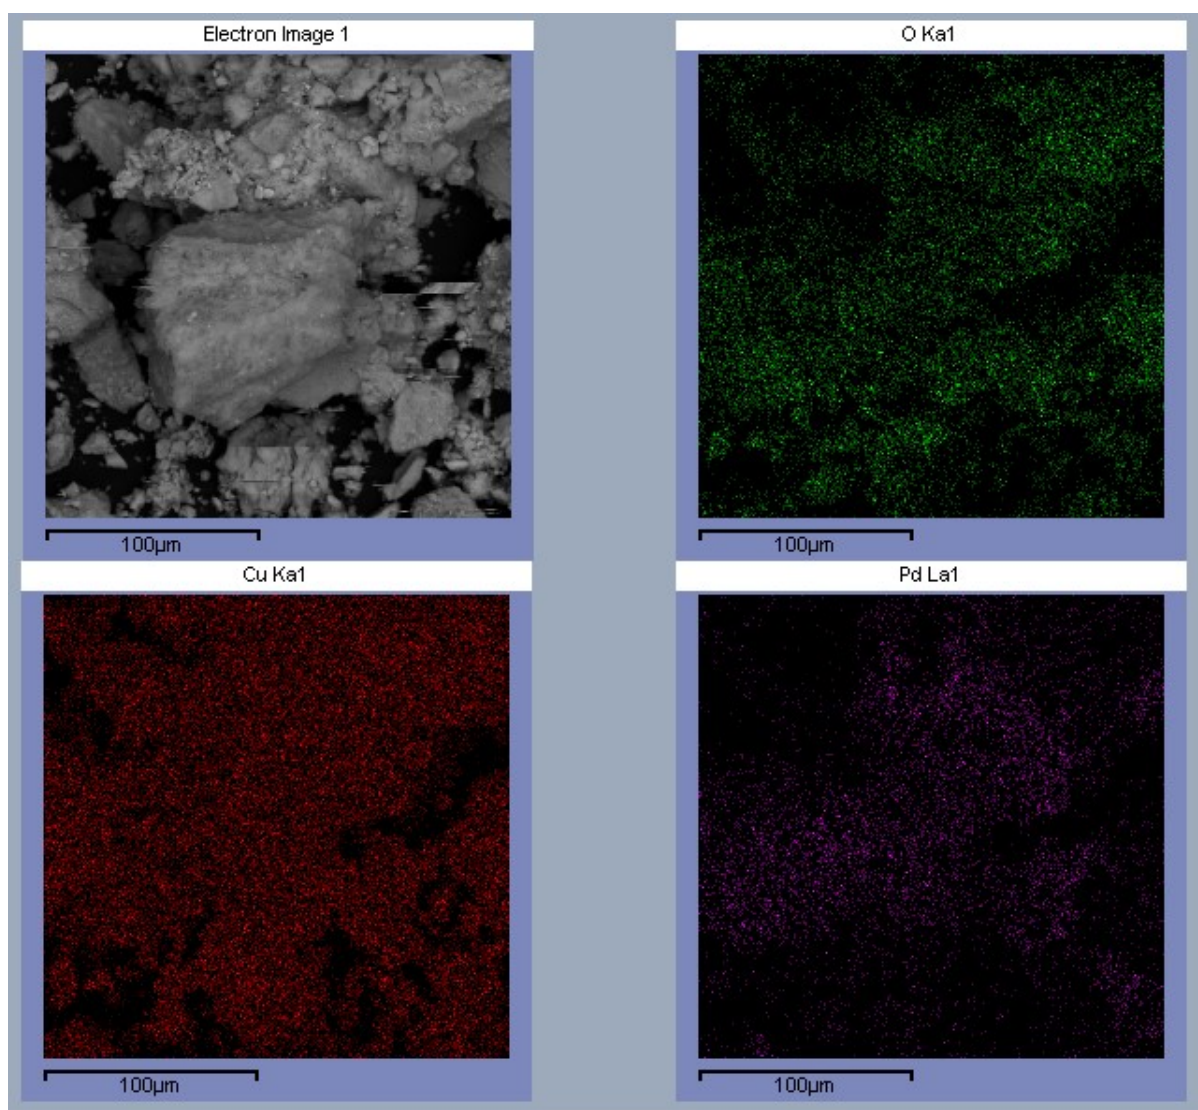

**Figure S3:** SEM-EDS elemental mapping of CuONRs@Pd<sub>6</sub>NPs

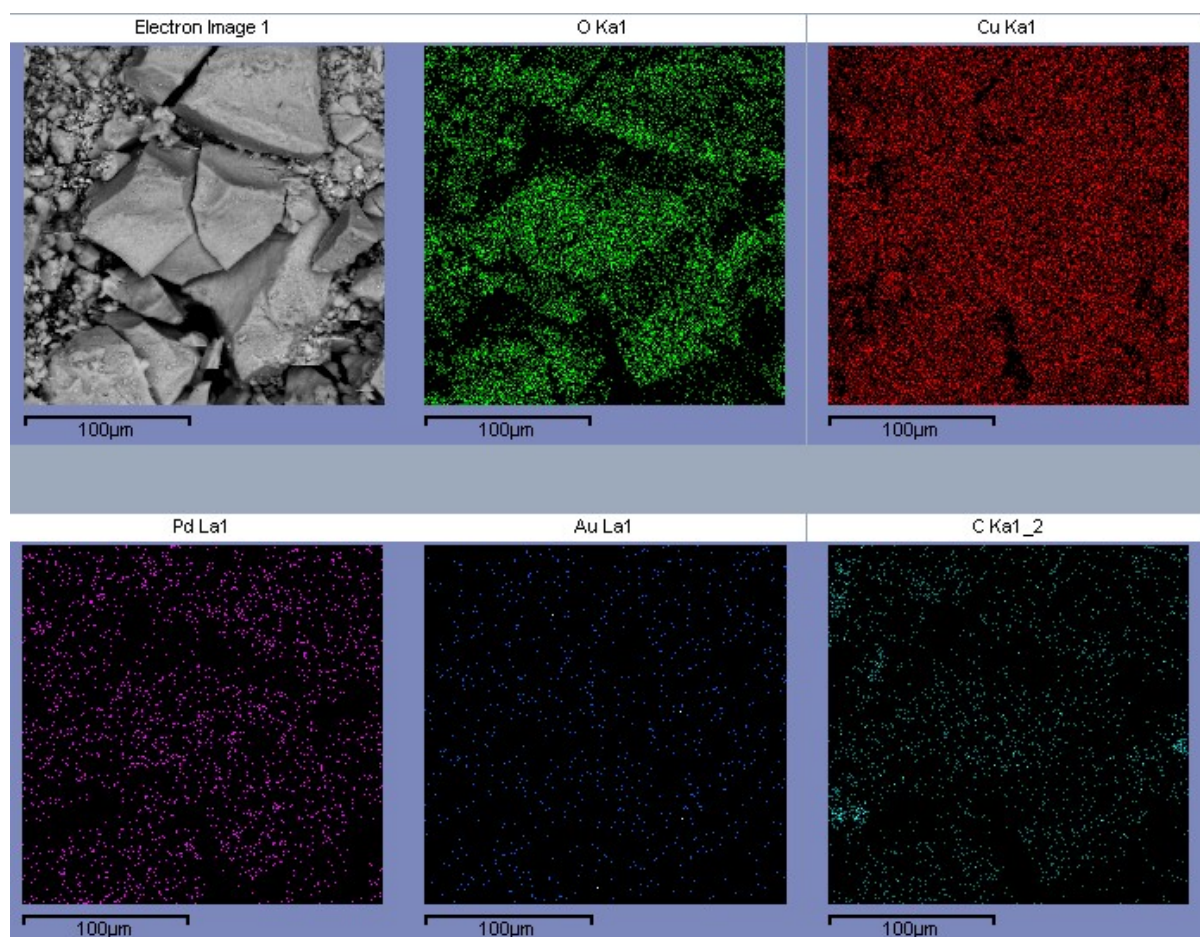

**Figure S4:** SEM-EDS elemental mapping of CuONRs@Au<sub>3</sub>Pd<sub>3</sub>NPs.
